# Supplementary material
Source: Springer Nature journal article supplement (https://www.springermedizin.de/resource/supplementary/13058_2011_2962_MOESM4_ESM.pdf/9702926)

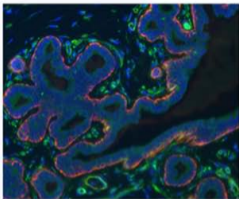

**Normal Breast**

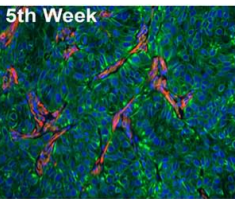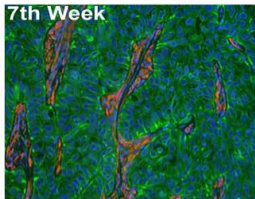

**NTC**

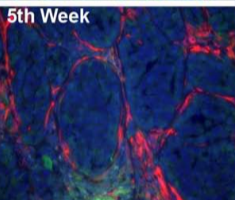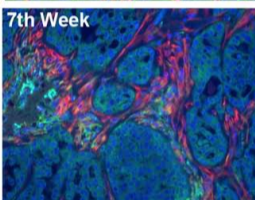

**HW11**

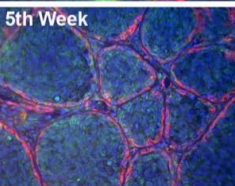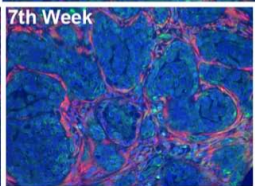

**HW13**

Supplement: MOESM4 [file 9702926]
